# Supplementary material for: Delay of systemic therapy confers a survival benefit in patients with stage IV non-small cell lung cancer
Source: Research Square preprint supplement (doi:10.21203/rs.3.rs-7400174/v1), 2025-08-27
Supplement: Supplementary file 1 [file 39ddddb5de71dc88a963402a.docx]

**Supplementary Figure 1.** Median overall survival, therapy group and age. In each age group, patients of the early TG had a significantly shorter overall survival than those of delayed TG.

**Supplementary Figure 2.** Median overall survival, therapy group and stages of distant metastases. In all stages (M1a - M1c), patients of the early TG had a significantly shorter overall survival than those of delayed TG.

**Supplementary Figure 3.** Median overall survival, therapy group and ECOG-PS. Across all ECOG-subgroups, patients of the early TG had a significantly shorter overall survival than those of delayed TG.

**Supplementary Figure 4.** Median overall survival, therapy group (TG) and type of therapy. A significantly shorter overall survival of patients of the early TG was observed for chemotherapy, immunochemotherapy, immunotherapy and additive therapy but not for targeted therapy.
